# Supplementary material
Source: PubMed Central journal article supplement (PMC6438615)
Supplement: NIHMS1015253-supplement-1.pdf [file NIHMS1015253-supplement-1.pdf]

# **Comparative cytotoxicity of respirable surface-treated/untreated calcium carbonate rock dust particles *in vitro***

Timur O. Khaliullin<sup>a,b</sup>, Elena R. Kisin<sup>a</sup>, Naveena Yanamala<sup>a</sup>, Supraja Guppi<sup>a</sup>, Martin Harper<sup>c</sup>,  
Taekhee Lee<sup>d</sup>, Anna A. Shvedova<sup>a,b</sup>

<sup>a</sup> Centers for Disease Control and Prevention, National Institute for Occupational Safety and Health, Health Effects Laboratory Division, Exposure Assessment Branch, 1095 Willowdale road, Morgantown, WV, 26505, USA

<sup>b</sup> West Virginia University, Department of Physiology and Pharmacology, PO Box 9229, Morgantown, WV, USA

<sup>c</sup> Zefon International, 5350 SW 1st Lane, Ocala, FL, 34474, USA

<sup>d</sup> Centers for Disease Control and Prevention, National Institute for Occupational Safety and Health, Pittsburgh Mining Research Division, 626 Cochran's Mill Road Pittsburgh, PA 15236, USA

## **Authors' emails:**

Timur Khaliullin: [ved2@cdc.gov](mailto:ved2@cdc.gov), [tokhaliullin@mix.wvu.edu](mailto:tokhaliullin@mix.wvu.edu)

Elena R. Kisin: [edk8@cdc.gov](mailto:edk8@cdc.gov)

Naveena Yanamala: [wqu1@cdc.gov](mailto:wqu1@cdc.gov)

Supraja Guppi: [mzi6@cdc.gov](mailto:mzi6@cdc.gov)

Martin Harper: [mHarper@zefon.com](mailto:mHarper@zefon.com)

Taekhee Lee: [fwc8@cdc.gov](mailto:fwc8@cdc.gov)

## **Corresponding author:**

Dr. Anna A. Shvedova,

Work phone: 304-285-6177

Mobile phone: 412-721-8503

Email: [ats1@cdc.gov](mailto:ats1@cdc.gov)

## Supplementary Material

### Estimation of human equivalent exposure for type II alveolar cells (A549)

Given that:

MSHA allowable exposure to coal mine dusts with silica <5% (**A**) = 1.5 mg/m<sup>3</sup> (respirable fraction)

Daily breathing volume (**B**) = 20 L/min = 20L/min \* 0.001 m<sup>3</sup>/L \* 60 min/hr \* 8hr/day = 9.6 m<sup>3</sup>/day

Average deposition efficiency of particles of size ~1-2 mm (**C**) = 15% = 0.15

Total number of type II epithelial cells in the alveolar space of the human lung (**D**) = 32,900 ±13,600 (x 10<sup>6</sup>) cells (Stone et al., 1992)

Dosage used *in vitro* :

If 15625 of the A549 cells (per well) were exposed to 2.5 µg (0.025 mg/ml in 100 µl) of rock dust particles in 96 well flask.

Deposited Concentration per cell (**E**) = 2.5µg / 15625 cells = 0.00016 µg per cell

Equivalent exposure duration in humans = (E x D) / (A x B x C) =

= (0.00016 µg/cell x (32,900 x 10<sup>6</sup> cells)) / (1.5 mg/m<sup>3</sup> x 9.6 m<sup>3</sup>/day x 0.15) =

= (5,264 mg) / ( 2.16 mg/day) = ~2,437 working days = ~9 years

### Estimation of human equivalent exposure for alveolar macrophages (THP-1)

Given that:

MSHA allowable exposure to coal mine dusts with silica <5% (**A**) = 1.5 mg/m<sup>3</sup> (respirable fraction)

Daily breathing volume (**B**) = 20 L/min = 20L/min \* 0.001 m<sup>3</sup>/L \* 60 min/hr \* 8hr/day = 9.6 m<sup>3</sup>/day

Average deposition efficiency of particles of size ~1-2 mm (**C**) = 15% = 0.15

Total number of macrophages in the alveolar space of the human lung (**D**) = 5,990 ±1,900 (x 10<sup>6</sup>) cells (Stone et al., 1992)

Dosage used *in vitro* :

If 15625 of the THP-1 cells (per well) were exposed to 2.5 µg (0.01 mg/ml in 100 µl) of rock dust particles in 96 well flask.

Deposited Concentration per cell (**E**) = 2.5µg / 15625 cells = 0.00016 µg per cell

Equivalent exposure duration in humans = (E x D) / (A x B x C) =

= (0.00016 µg/cell x (5,990 x 10<sup>6</sup> cells)) / (1.5 mg/m<sup>3</sup> x 9.6 m<sup>3</sup>/day x 0.15) =

= (958.4 mg) / ( 2.16 mg/day) = ~443.7 working days = ~1.5 years

| Sample | Average quartz content, % |
|--------|---------------------------|
| UL     | 0.84±0.22                 |
| TL     | 1.02±0.12                 |
| UM     | 0.08                      |
| TM     | 0.05±0.04                 |

**Supplementary Table 1.** Quartz content in respirable fractions of rock dust

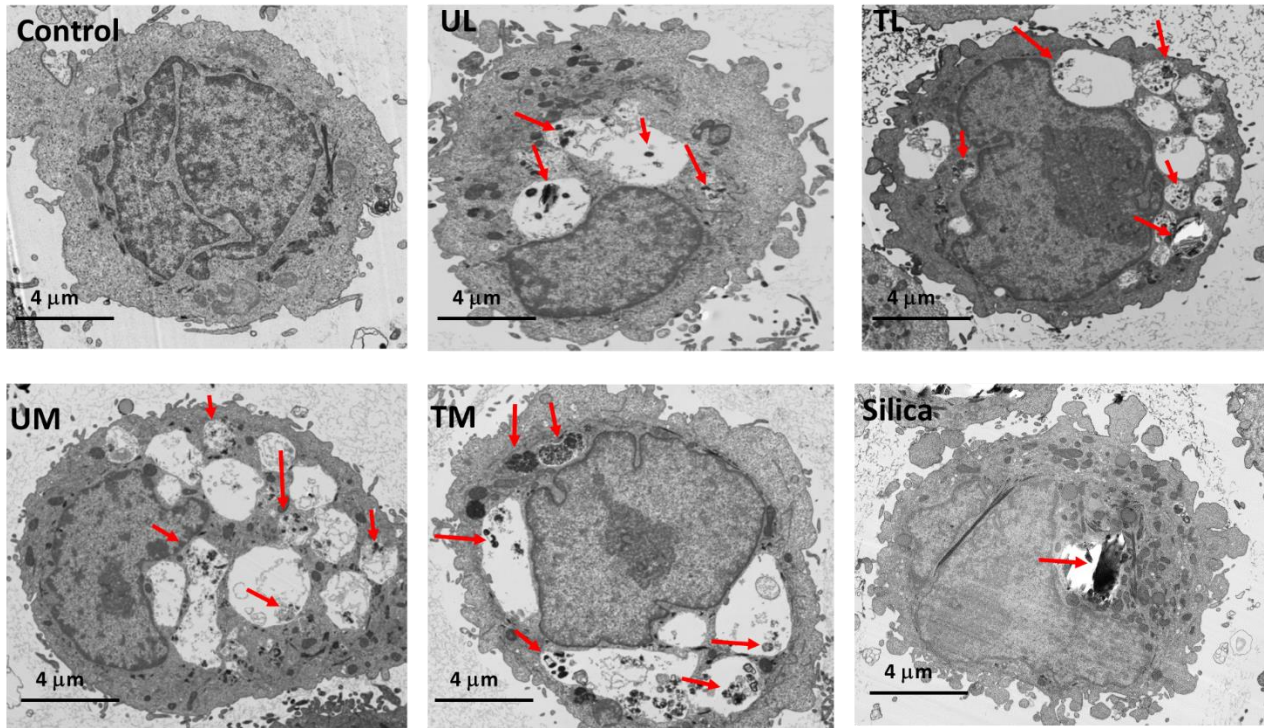

**Supplementary Figure 1.** TEM micrographs of A549 cells exposed to different rock dust or silica for 72 h (0.1 mg/ml). Red arrows indicate particle uptake.

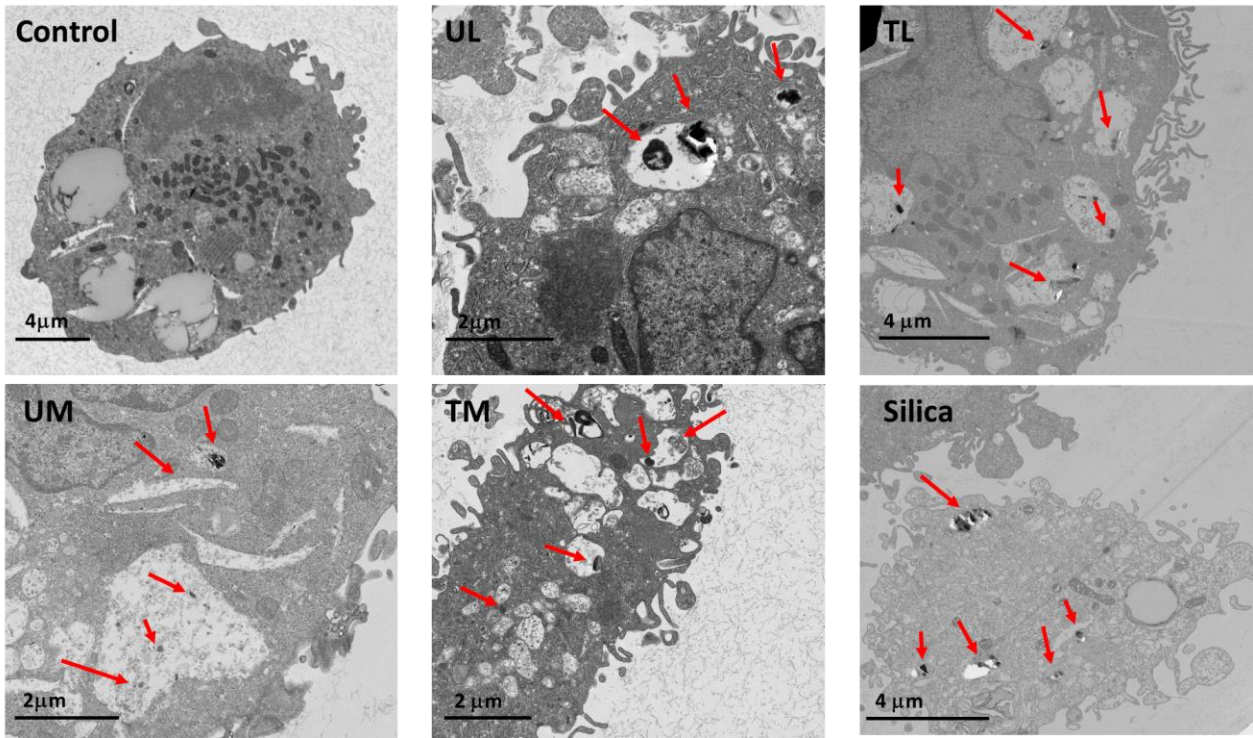

**Supplementary Figure 2.** TEM micrographs of THP-1 cells exposed to different rock dust or silica for 24 h (0.1 mg/ml). Red arrows indicate particle uptake.

|           | IL-1b | IL-1ra   | IL-4     | IL-6     | IL-7     | IL-8     | IL-9     | IL-10    | IL-12(p70) | IL-13    | IL-17    | Eotaxin  | FGF basic | IFN-g    | IP-10    | MCP-1    | MIP-1a   | PDGF-bb  | MIP-1b   | RANTES   | TNF-a    |     |
|-----------|-------|----------|----------|----------|----------|----------|----------|----------|------------|----------|----------|----------|-----------|----------|----------|----------|----------|----------|----------|----------|----------|-----|
| Control   | 100   | 100      | 100      | 100      | 100      | 100      | 100      | 100      | 100        | 100      | 100      | 100      | 100       | 100      | 100      | 100      | 100      | 100      | 100      | 100      | 100      | 100 |
| UM_0.025  | 129.6 | 148.0304 | 118.1144 | 132.1914 | 126.1194 | 143.4634 | 106.037  | 177.9157 | 111.1969   | 132.8296 | 211.781  | 137.6259 | 172.4666  | 123.8985 | 150.629  | 92.49643 | 128.2051 | 131.4884 | 155.3861 | 119.2275 | 132.062  |     |
| UM_0.1    | 139.2 | 143.4658 | 83.68644 | 139.4458 | 123.041  | 159.7156 | 97.56098 | 112.1951 | 136.8726   | 108.1362 | 232.6881 | 154.2684 | 167.1458  | 124.6995 | 160.9208 | 113.2656 | 126.2019 | 112.3459 | 158.5339 | 123.1577 | 148.6599 |     |
| UM_0.2    | 164.8 | 198.377  | 158.8983 | 176.5239 | 92.35075 | 251.1314 | 126.1028 | 137.4723 | 147.8764   | 71.39728 | 336.1588 | 186.868  | 237.1397  | 234.5534 | 182.3797 | 171.2113 | 173.0769 | 119.2644 | 225.0381 | 140.2677 | 180.0002 |     |
| TM_0.025  | 144   | 177.6839 | 111.2288 | 151.738  | 149.1981 | 153.2443 | 136.2221 | 198.3149 | 140.5405   | 148.0508 | 252.2401 | 168.2365 | 215.8373  | 141.181  | 167.4222 | 95.70414 | 134.6154 | 158.4815 | 161.3956 | 133.7456 | 182.6291 |     |
| TM_0.1    | 144   | 173.0854 | 125      | 153.5516 | 135.541  | 169.5565 | 121.0863 | 194.7672 | 147.8764   | 150.3869 | 234.9336 | 163.2637 | 224.8329  | 129.4776 | 164.1927 | 120.624  | 144.2308 | 155.4345 | 173.1282 | 136.1342 | 180.062  |     |
| TM_0.2    | 196.8 | 244.6999 | 175.8475 | 169.2695 | 181.5299 | 130.6983 | 178.1266 | 145.898  | 175.9073   | 148.2698 | 350.5808 | 195.2887 | 320.2318  | 128.6814 | 188.9236 | 125.069  | 177.8846 | 200.6022 | 174.2156 | 156.0224 | 200.8765 |     |
| UL_0.025  | 139.2 | 185.8833 | 99.04661 | 149.9244 | 104.737  | 139.4814 | 93.40944 | 177.9157 | 134.6718   | 117.8274 | 188.1637 | 153.0307 | 155.4495  | 122.3802 | 141.0766 | 115.8268 | 115.3846 | 85.93825 | 144.6837 | 124.784  | 132.9898 |     |
| UL_0.1    | 139.2 | 157.0583 | 120.7627 | 156.9773 | 99.36591 | 142.3421 | 140.6331 | 144.2129 | 140.5405   | 122.3719 | 228.7196 | 157.0531 | 191.476   | 134.3658 | 167.9746 | 133.9202 | 132.6923 | 119.2644 | 168.8358 | 121.5653 | 162.5775 |     |
| UL_0.2    | 116.8 | 148.3686 | 143.0085 | 123.3249 | 116.2253 | 96.2675  | 160.8718 | 81.89209 | 128.8031   | 138.0859 | 164.0044 | 123.923  | 231.6017  | 137.7422 | 155.8981 | 150.1015 | 129.8077 | 120.6983 | 149.5675 | 109.131  | 127.8094 |     |
| TL_0.025  | 137.6 | 172.2739 | 130.2966 | 139.2443 | 110.1828 | 136.2881 | 111.0535 | 150.9534 | 128.8031   | 133.8152 | 231.6234 | 153.0086 | 175.7457  | 119.6077 | 148.6686 | 119.2655 | 122.1154 | 114.6042 | 162.7691 | 117.0591 | 153.8661 |     |
| TL_0.1    | 121.6 | 157.1006 | 118.1144 | 125.3401 | 82.50653 | 113.2566 | 113.7779 | 112.6386 | 128.8031   | 92.75077 | 184.5824 | 129.4484 | 190.5577  | 118.9515 | 138.493  | 113.6642 | 104.8077 | 91.19587 | 123.0498 | 111.6043 | 142.4538 |     |
| TL_0.2    | 147.2 | 154.3533 | 139.8305 | 123.3249 | 138.3812 | 115.6331 | 128.8272 | 13.5255  | 120.1544   | 101.9492 | 184.292  | 129.4484 | 221.7883  | 146.3279 | 145.7508 | 140.3102 | 110.5769 | 113.0987 | 124.7668 | 107.8096 | 127.8352 |     |
| Sil_0.025 | 100.8 | 130.3128 | 155.7203 | 104.3829 | 87.46736 | 114.0512 | 112.74   | 90.64302 | 122.9344   | 106.9864 | 138.2965 | 113.5795 | 111.5654  | 118.4257 | 129.5185 | 92.70488 | 84.61538 | 110.2667 | 69.59468 | 103.8794 | 115.1754 |     |
| Sil_0.1   | 97.6  | 139.0025 | 83.15678 | 104.3829 | 102.4804 | 118.2012 | 79.52776 | 70.95344 | 134.6718   | 122.5909 | 140.542  | 112.165  | 89.46497  | 111.3096 | 138.493  | 97.99516 | 90.38462 | 79.90393 | 95.29206 | 106.1833 | 98.41247 |     |
| Sil_0.2   | 118.4 | 152.6965 | 185.3814 | 113.0479 | 105.3338 | 163.8668 | 161.5205 | N/D      | 140.5405   | 93.57205 | 188.0089 | 114.9498 | 162.559   | 148.2175 | 162.391  | 133.7591 | 125      | 110.2309 | 122.9353 | 119.4647 | 154.9486 |     |

Supplementary Table 2. Cytokine secretion in supernatants of A549 cells exposed to various Rock Dusts or crystalline silica.

|           | IL-1b    | IL-6     | IL-12(p70) | G-CSF    | GM-CSF   | IFN-g    | TNF-a    | IL-2     | IL-4     | IL-5     | IL-9     | IL-10    | IL-13    | Eotaxin  | IP-10    | MCP-1(MIP-1a) | MIP-1a   | MIP-1b   |     |
|-----------|----------|----------|------------|----------|----------|----------|----------|----------|----------|----------|----------|----------|----------|----------|----------|---------------|----------|----------|-----|
| Control   | 100      | 100      | 100        | 100      | 100      | 100      | 100      | 100      | 100      | 100      | 100      | 100      | 100      | 100      | 100      | 100           | 100      | 100      | 100 |
| UM_0.025  | 82.23231 | 107.9523 | 151.0412   | 115.8082 | 114.6176 | 127.7058 | 108.7528 | 109.7135 | 111.0519 | 220.7549 | 126.7217 | 115.2272 | 114.2857 | 141.8824 | 104.8782 | 136.5605      | 111.3852 | 133.3271 |     |
| UM_0.05   | 85.74777 | 104.7714 | 121.5217   | 119.6483 | 107.1903 | 137.1751 | 116.1479 | 131.3767 | 112.9161 | 253.3021 | 120.1585 | 104.4051 | 149.8829 | 121.8142 | 135.902  | 125.4448      | 121.0411 | 129.9036 |     |
| UM_0.1    | 139.3877 | 163.3201 | 122.5973   | 148.2873 | 112.3179 | 138.3479 | 163.9922 | 124.8078 | 131.2916 | 285.8493 | 148.0299 | 117.5858 | 142.8571 | 146.3375 | 111.9995 | 146.766       | 178.3634 | 215.4964 |     |
| UM_0.2    | 113.4173 | 160.6362 | 143.4783   | 166.8243 | 125.1136 | 183.0884 | 180.4434 | 172.7463 | 150.7324 | 502.359  | 148.7666 | 136.2123 | 185.4801 | 176.8814 | 132.0421 | 176.5687      | 188.805  | 255.7597 |     |
| TM_0.025  | 250.969  | 242.3495 | 135.3066   | 182.5656 | 111.3702 | 153.8704 | 260.1227 | 119.7749 | 140.274  | 159.8214 | 163.5563 | 124.976  | 118.0812 | 149.6762 | 123.5737 | 115.7241      | 218.2229 | 410.1668 |     |
| TM_0.05   | 501.6274 | 543.1392 | 159.6533   | 289.3303 | 110.735  | 205.7031 | 505.8214 | 167.5241 | 146.5753 | 71.42857 | 170.4728 | 114.5103 | 90.0369  | 183.7333 | 120.3564 | 95.47718      | 227.567  | 844.0575 |     |
| TM_0.1    | 736.2685 | 929.1214 | 162.0803   | 371.6313 | 117.102  | 265.7372 | 791.486  | 230.0643 | 198.0822 | 96.42857 | 215.1723 | 179.5668 | 143.1734 | 193.981  | 146.2099 | 100.4025      | 245.9511 | 1673.066 |     |
| TM_0.2    | 1090.891 | 1535.439 | 145.9518   | 620.4913 | 130.9121 | 333.3291 | 1226.067 | 290.5145 | 220.8219 | 180.3571 | 189.7384 | 158.6352 | 118.0812 | 209.981  | 150.7233 | 99.39286      | 234.4813 | 2209.097 |     |
| UL_0.025  | 138.7933 | 74.59424 | 96.10197   | 91.72651 | 95.54923 | 92.73098 | 93.11649 | 92.08633 | 97.14937 | 96.42857 | 110.6364 | 87.68962 | 92.06897 | 113.2288 | 96.40959 | 116.5416      | 98.58944 | 95.48739 |     |
| UL_0.05   | 152.7525 | 95.52832 | 95.99249   | 101.5298 | 97.37401 | 100.4615 | 112.2542 | 118.4283 | 104.447  | 139.2857 | 108.7709 | 100.0134 | 94.82759 | 104.4603 | 99.58034 | 118.6333      | 117.0034 | 121.8566 |     |
| UL_0.1    | 124.2348 | 121.4972 | 107.1119   | 121.1427 | 107.4724 | 133.2742 | 159.3855 | 119.3138 | 113.569  | 160.7143 | 135.0985 | 104.2825 | 120.6897 | 129.2739 | 111.7225 | 167.5957      | 160.824  | 168.2495 |     |
| UL_0.2    | 216.4268 | 115.6012 | 103.2881   | 118.0331 | 99.09415 | 137.1439 | 183.0327 | 121.5274 | 120.8666 | 180.3571 | 123.5896 | 99.04685 | 126.2069 | 114.9642 | 99.58034 | 133.1216      | 172.3651 | 183.8234 |     |
| TL_0.025  | 177.0885 | 77.60417 | 107.3426   | 87.42679 | 100.7134 | 101.0457 | 114.5778 | 88.86986 | 98.4456  | 153.8462 | 107.3802 | 82.19027 | 102.9963 | 101.1579 | 118.8243 | 90.70329      | 106.7462 | 103.4174 |     |
| TL_0.05   | 126.9914 | 102.2569 | 76.52384   | 97.87434 | 109.7627 | 94.59539 | 129.0472 | 119.6918 | 102.0725 | 253.8462 | 103.5839 | 75.35951 | 79.77528 | 100.2807 | 104.9361 | 109.0554      | 154.7133 | 117.7895 |     |
| TL_0.1    | 162.6006 | 143.9236 | 125.4074   | 115.6605 | 113.3452 | 123.4461 | 191.3747 | 199.6575 | 124.0933 | 199.5731 | 131.2527 | 101.3551 | 122.4719 | 137.193  | 114.0004 | 127.0972      | 194.9041 | 233.7527 |     |
| TL_0.2    | 117.1385 | 147.309  | 116.717    | 123.1726 | 112.7792 | 129.828  | 180.091  | 178.5959 | 127.7202 | 253.8462 | 128.1318 | 99.4469  | 117.2285 | 129.1579 | 119.8564 | 148.9083      | 200.007  | 208.5075 |     |
| Sil_0.005 | 361.6429 | 442.9818 | 218.693    | 213.9218 | 120.7065 | 200.2119 | 773.6704 | 170.8637 | 181.8182 | 165.1288 | 161.8638 | 188.8065 | 151.7241 | 184.7404 | 121.1209 | 195.397       | 238.3543 | 568.388  |     |
| Sil_0.01  | 364.1757 | 288.7273 | 119.9098   | 158.7494 | 101.964  | 128.8061 | 241.4724 | 107.076  | 140.6566 | 100.0885 | 145.9939 | 117.2286 | 110.6897 | 119.5285 | 98.30875 | 85.11166      | 164.6784 | 306.8592 |     |
| Sil_0.025 | 1571.033 | 1781.309 | 140.6902   | 691.9004 | 134.8216 | 295.461  | 991.4005 | 216.7534 | 254.0404 | 194.8971 | 188.571  | 178.8604 | 167.5862 | 217.8401 | 166.3717 | 116.3896      | 245.6621 | 1592.297 |     |
| Sil_0.05  | 4238.152 | 3011.345 | 145.6415   | 1154.992 | 140.0495 | 415.2331 | 1863.046 | 281.5817 | 353.2828 | 130.2874 | 184.3205 | 202.9332 | 146.8966 | 272.0293 | 179.882  | 105.0124      | 252.4812 | 1667.132 |     |

Supplementary Table 3. Cytokine secretion in supernatants of THP-1 cells exposed to various Rock Dusts or crystalline silica.

**References:**

Stone KC, Mercer RR, Gehr P, Stockstill B, Crapo JD (1992) Allometric relationships of cell numbers and size in the mammalian lung. *Am J Respir Cell Mol Biol* 6:235-243.
